# Supplementary material for: Characterization of Musty Odor-Producing Actinomycetes from Tropics and Effects of Temperature on the Production of Musty Odor Compounds
Source: PubMed Central journal article supplement (PMC5745020; doi:10.1264/jsme2.me17109), 2017-10-31
Supplement: 32_352_s1.pdf [file 32_352_s1.pdf]

## Supplementary information

**Table S1.** Primer pairs used for PCR amplification.

| Primer             | Target gene | Sequences (5' - 3')                             | Product length (bp) | Annealing temp. (°C) | Reference |
|--------------------|-------------|-------------------------------------------------|---------------------|----------------------|-----------|
| 27F<br>1492R       | 16S rRNA    | AGAGTTTGATCCTGGCTCAG<br>GGTTACCTTGTTACGACTT     | 1,465               | 55                   | (1)       |
| AMmib-F<br>AMmib-R | <i>tpc</i>  | TGGACGACTGCTACTGCGAG<br>AAGGCGTGCTGTAGTTCGTTGTG | 592                 | 58                   | (2)       |
| 250F<br>971R       | <i>geoA</i> | TTCTTCGACGAYCACTTCC<br>CCCTYGTTTCATGTARCGGC     | 743                 | 55                   | (3)       |

**Table S2:** Summary of water quality parameters for over four months of sampling from Titiwangsa Lake.

| <b>Parameters</b>       | <b>September<br/>(2015)</b> | <b>October<br/>(2015)</b> | <b>November<br/>(2015)</b> | <b>January<br/>(2016)</b> |
|-------------------------|-----------------------------|---------------------------|----------------------------|---------------------------|
| Temperature (°C) (mean) | 31.93                       | 30.48                     | 31.66                      | 31.86                     |
| pH                      | 8.11                        | 8.69                      | 7.7                        | 8.48                      |
| DO (mg/L)               | 6.06                        | 7.35                      | 8.1                        | 6.68                      |
| Turbidity (NTU)         | 5.1                         | 4.9                       | 4.9                        | 103.0                     |
| Conductivity (µS/cm)    | 157.0                       | 158.0                     | 149.0                      | 236.0                     |
| TDS (g/L)               | 0.099                       | 0.103                     | 0.097                      | 0.151                     |
| Chl-a (µg/L)            | 4.634                       | 5.566                     | 3.079                      | 2.515                     |
| Nitrate (mg/L)          | ND                          | 0.128                     | 0.085                      | ND                        |
| Nitrite (mg/L)          | 0.003                       | 0.001                     | 0.007                      | 0.002                     |
| Ammonia (mg/L)          | ND                          | ND                        | ND                         | ND                        |
| Phosphate (mg/L)        | 0.003                       | 0.003                     | 0.028                      | ND                        |

ND = not detected

## Supplemental figure legends

**Fig.S1** Six purified actinomycetes strains cultivated on YMPD agar plate. a) T-S1, b) T-S2, c) U-S3, d) T-S4, e) T-S5, and f) U-S6.

**Fig.S2** Results of electrophoresis of amplified *geoA* from six isolated strains by PCR primed with 250F and 971R at an annealing temperature of 55°C. a) Lane 1 = T-S1; lane 4 = T-S2; lane 7 = U-S3 b) lane 1 = T-S4; lane 4 = T-S5; lane 7 = U-S6. Lanes 2, 5, and 8 and lanes 3, 6, and 9 show results of the isolates diluted four- and eight-fold, respectively.

**Fig. S3** Results of electrophoresis of the target *tpc* amplified from six isolated strains by PCR primed with AMmib-F and AMmib-R at an annealing temperature of 58°C. (a) Lane 1 = T-S1; lane 4 = T-S2; lane 7 = U-S3 (b) lane 1 = T-S4; lane 4 = T-S5; lane 7 = U-S6. Lanes 2, 5, and 8 and lanes 3, 6, and 9 show results of the isolates diluted four- and eight-fold, respectively.

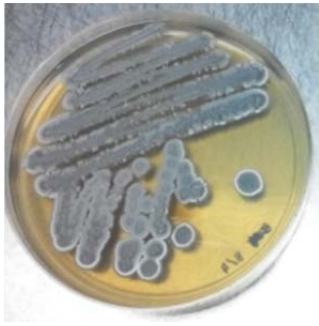

(a)

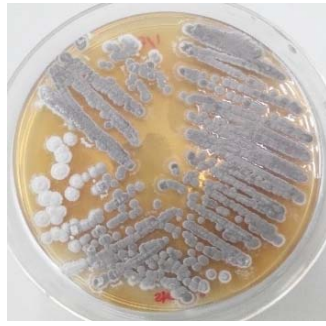

(b)

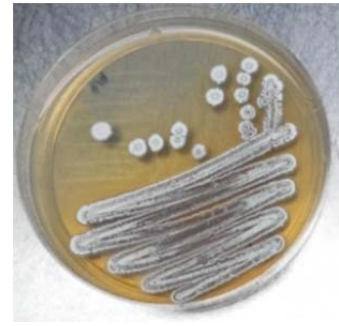

(c)

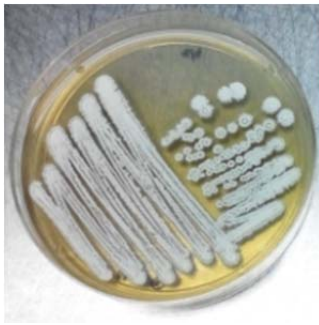

(d)

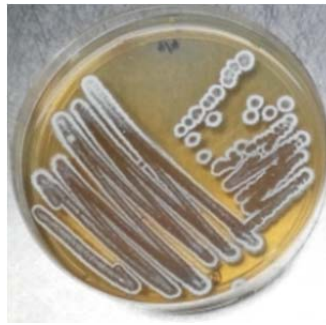

(e)

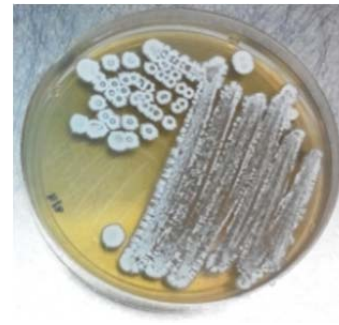

(f)

*Fig. S1 Nurul Syahirah Shamsol Anuar et al.,*

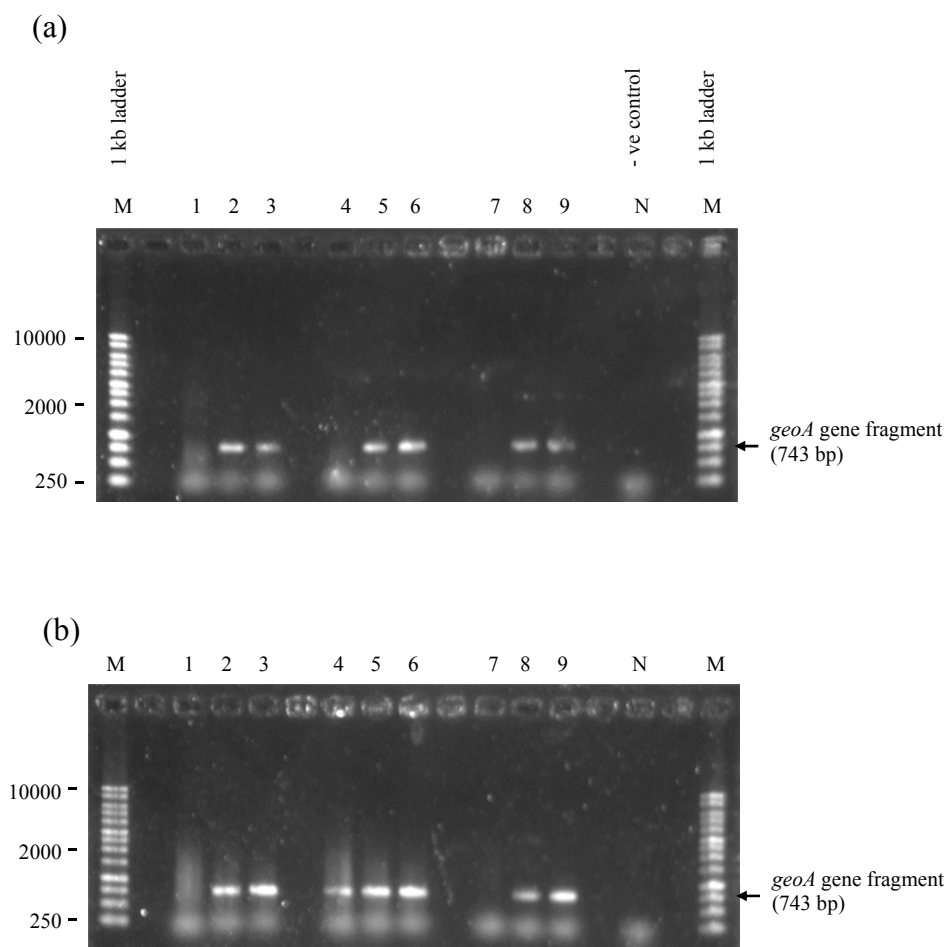

Fig. S2 Nurul Syahirah Shamsol Anuar et al.,

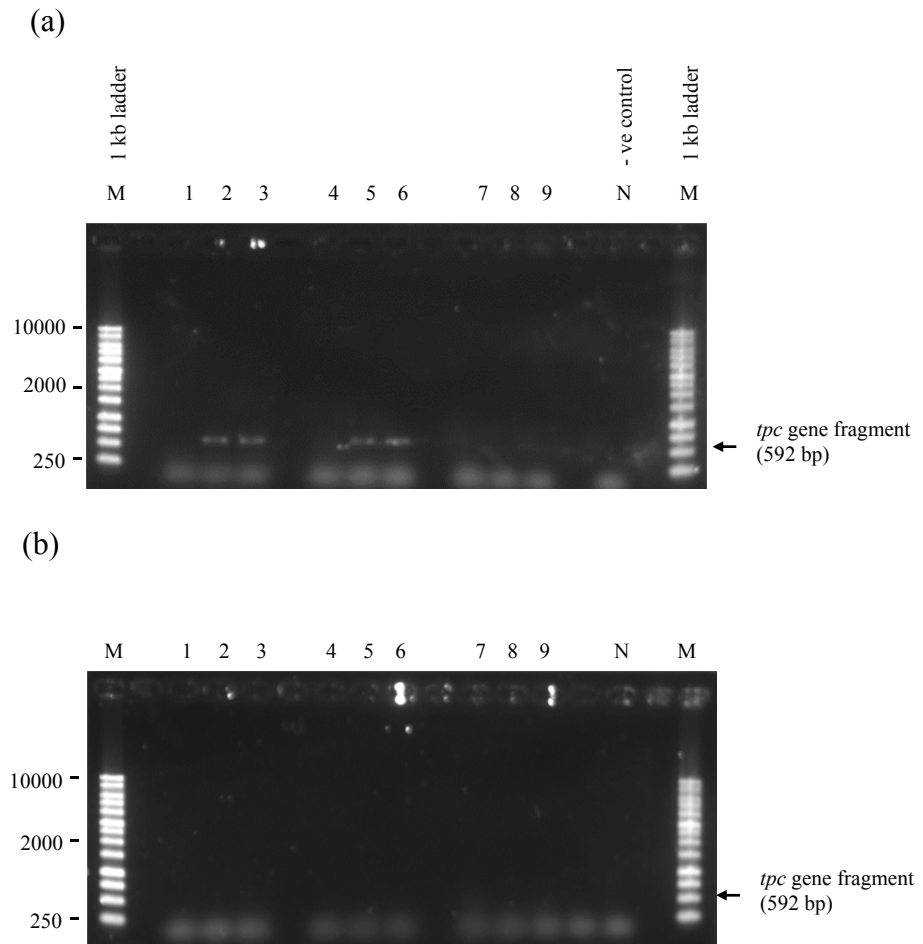

Fig. S3 Nurul Syahirah Shamsol Anuar et al.,

### References for supplemental data

1. Lane, D. J. 1991. 16S/23S rRNA sequencing, p. 115–175. *In* M. Stackebrandt and M. Goodfellow (ed.), *Nucleic Acid Techniques in Bacterial Systematics*. Wiley, New York.
2. Auffret, M., A. Pilote, E. Proulx, D. Proulx, G. Vanderberg, and R. Villemur. 2011. Establishment of real time PCR method for quantification of geosmin-producing *Streptomyces* spp. in recirculating aquaculture systems. *Water Research*. 45:6762–6753.
3. Giglio, S., J. Jiang, C. P. Saint, D. E. Cane, and P.T. Monis. 2008. Isolation and characterization of the gene associated with geosmin production in cyanobacteria. *Environmental Science & Technology*. 42:8027–8032.
